# Supplementary material for: Screening of the Anti-Neurodegenerative Activity of Caffeic Acid after Introduction into Inorganic Metal Delivery Systems to Increase Its Solubility as the Result of a Mechanosynthetic Approach
Source: MDPI journal article supplement (doi:10.3390/ijms24119218), 2023-05-24
Supplement: s1 [file s1]

**Table S1.** Selected solubility values ( $\mu\text{g/mL}$ ) of CA, freeze-dried and ball milled (after 20 min) CA; solubility values of the physical mixtures 1:1 and 1:3 mass ratio with excipients; selected solubility values of CA and freeze-dried and ball milled (after 20 min) solid dispersions in mass ratio 1:1 and 1:3. \* indicated statistic significance; Abbreviations: HP- $\beta$ -CD - hydroxypropyl- $\beta$ -cyclodextrin, Koll.VA64 - Kollidon VA 64, Eud.L100 Eudragit L100, Goh - Gohsenol EG-05PW, Neu - Neusilin US2, phm – physical mixture, FD – freeze dried, BM – ball milled.

| Substance/solid dispersion | Solubility ( $\mu\text{g/mL}$ ) |                         |
|----------------------------|---------------------------------|-------------------------|
|                            | Mass ratio                      |                         |
|                            | 1:1                             | 1:3                     |
| CA                         | $303.274 \pm 6.218$             |                         |
| CA_HP- $\beta$ -CD_PHM     | $1232.670 \pm 3.341^*$          | $2022.361 \pm 20.223^*$ |
| CA_Koll.VA64_PHM           | $1067.618 \pm 6.911^*$          | $1993.973 \pm 19,939^*$ |
| CA_Neu_PHM                 | $2535.204 \pm 5.352^*$          | $3281.838 \pm 15.283^*$ |
| CA_Goh_PHM                 | $330.888 \pm 3.520$             | $359.415 \pm 7.543$     |
| CA_Eud.L100_PHM            | $345.968 \pm 1.602$             | $365.584 \pm 6.345$     |
| CA_FD                      | $302.164 \pm 5.579$             |                         |
| CA_HP- $\beta$ -CD_FD      | $1298.020 \pm 1.794^*$          | $2262.34 \pm 14.766^*$  |
| CA_Koll.VA64_FD            | $916.859 \pm 6.338^*$           | $758.203 \pm 2.071^*$   |
| CA_Neu_FD                  | $2605.226 \pm 18.166$           | $3007.422 \pm 17.653^*$ |

|                           |                                           |                         |
|---------------------------|-------------------------------------------|-------------------------|
| CA_Goh_FD                 | $382.914 \pm 7.105$                       | $404.325 \pm 4.058^*$   |
| CA_Eud.L100_FD            | $388.755 \pm 6.145$                       | $401.663 \pm 6.532^*$   |
| CA_BM_20'                 | $309.086 \pm 5.476$                       |                         |
| CA_HP- $\beta$ -CD_BM_20' | $1139.644 \pm 4.755^*$                    | $2077.756 \pm 20.777^*$ |
| CA_Koll.VA64_BM_20'       | $953.609 \pm 3.294^*$                     | $1580.101 \pm 15.800^*$ |
| CA_Neu_BM_20'             | <b><math>5449.017 \pm 19.420^*</math></b> | $3725.359 \pm 8.755^*$  |
| CA_Goh_BM_20'             | $312.335 \pm 3.304$                       | $331.415 \pm 4.205$     |
| CA_Eud.L100_BM_20'        | $309.454 \pm 2.316$                       | $329.544 \pm 3.646$     |

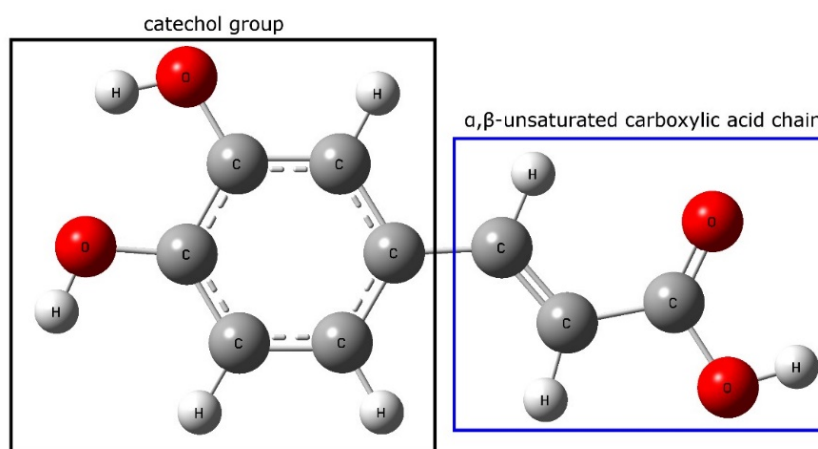

**Figure S1.** The optimized geometry of the caffeic acid, containing a catechol group with an  $\alpha,\beta$ -unsaturated carboxylic acid chain.

**Table S2.** Selected experimental and theoretical modes (in  $\text{cm}^{-1}$ ) characteristic vibronic features of caffeic acid. Legend: r–rocking, s–stretching, w–wagging, def.–deformation, side chain -  $\alpha,\beta$ -unsaturated carboxylic acid chain

| <b>DFT<br/>[<math>\text{cm}^{-1}</math>]</b> | <b>EXP<br/>[<math>\text{cm}^{-1}</math>]</b> | <b>Band assignment</b>                                                                           |
|----------------------------------------------|----------------------------------------------|--------------------------------------------------------------------------------------------------|
| 424                                          | 457                                          | O–H w in catechol group                                                                          |
| 512                                          | 550<br>575                                   | def. all molecule                                                                                |
| 568                                          | 588                                          | COOH b + def. benzene ring                                                                       |
| 580                                          | 602                                          | C–H w at side chain and benzene ring + O–H w in side chain                                       |
| 632                                          | 646<br>698                                   | O–H w in side chain + CCC t in benzene ring + C–H w at benzene ring                              |
| 656                                          | 737<br>779                                   | COOH b + CCC b in all molecule                                                                   |
| 752                                          | 800<br>814                                   | C–H w in all molecule + C–O–H w in side chain + CCC t in side chain                              |
| 800                                          | 849                                          | C–OH s in catechol group + CCC s in benzene ring or C–H w at benzene ring                        |
| 872                                          | 893                                          | C–H w at benzene ring and side chain                                                             |
| 976                                          | 935                                          | C–H r in all molecule + O–H b in side chain                                                      |
| 1032                                         | 968                                          | C–H w at side chain                                                                              |
| 1152                                         | 1119                                         | C–H r in all molecule + O–H b in side chain                                                      |
| 1224                                         | 1173                                         | C–O–H b in catechol group + C–H r at benzene ring + CC s in benzene ring                         |
| 1272                                         | 1213                                         | C–H b at side chain + O–H b in side chain                                                        |
| 1320                                         | 1273                                         | breathing benzene ring + C–H r in all molecule + C–O–H b in side chain + O–H b in catechol group |
| 1352                                         | 1294                                         | breathing benzene ring + C–H r at side chain + O–H b in side chain                               |
| 1408                                         | 1352                                         | CC s in benzene ring + O–H b in all molecule                                                     |
| 1504                                         | 1375                                         | CC s in benzene ring + O–H b catechol group                                                      |
| 1568                                         | 1447                                         | CC s in benzene ring                                                                             |
| 1648                                         | 1522                                         | CC s in benzene ring and C=C s in side chain + O–H b in catechol group                           |
| 1664                                         | 1599                                         | CC s in benzene ring and C=C s in side chain + O–H b in catechol group                           |
| 1696                                         | 1616                                         | CC s in benzene ring and C=C s in side chain + O–H b in catechol group                           |
| 1808                                         | 1641                                         | C=O s and O–H b in side chain                                                                    |
| 3768                                         | 3217                                         | O–H s in side chain                                                                              |
| 3784                                         | 3402                                         | O–H s in catechol group                                                                          |
| 3840                                         | 3428                                         | O–H s in catechol group                                                                          |
